# Supplementary material for: Mrp1 is involved in lipid presentation and iNKT cell activation by Streptococcus pneumoniae
Source: PubMed Central journal article supplement (PMC6189046; doi:10.1038/s41467-018-06646-8), 2018-10-15
Supplement: 41467_2018_6646_MOESM3_ESM.pdf [file 41467_2018_6646_MOESM3_ESM.pdf]

## Description of Additional Supplementary Files

### Supplementary Data 1

Description: Genes identified in primary screen: Data represents the normalized IL-2 values (% control) and viability (% control).

### Supplementary Data 2

Description: Secondary screen analysis: Data represents the normalized IL-2 values for primary and secondary screen.

### Supplementary Data 3

Description: GO analysis of the hits identified: Data represents various GO classes identified in our screen along with the genes in each class obtained using Cytoscape 2.8.3.

### Supplementary Data 4

Description: Deconvolution screen: Data represents the normalized IL-2 values for the four different siRNAs used for identified genes.
